# Supplementary figures and images for: Prdm16 Supports Arterial Flow Recovery by Maintaining Endothelial Function
Source: PubMed Central journal article supplement — Circ Res. 2021 Apr 27;129(1):63–77. doi: 10.1161/CIRCRESAHA.120.318501 (PMC8221541; doi:10.1161/circresaha.120.318501), 2021-04-27

**Gel 1**

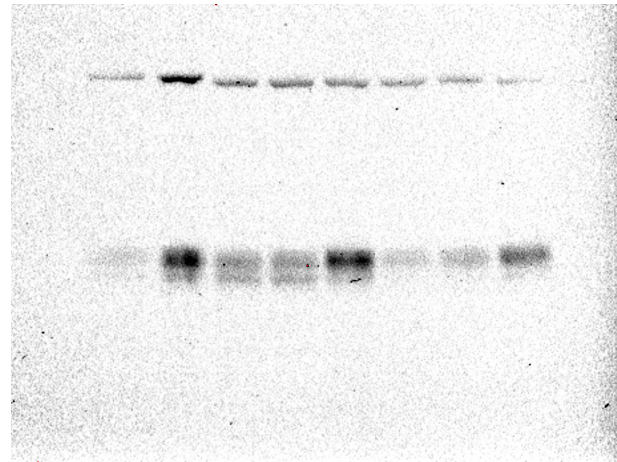

**Gel 2**

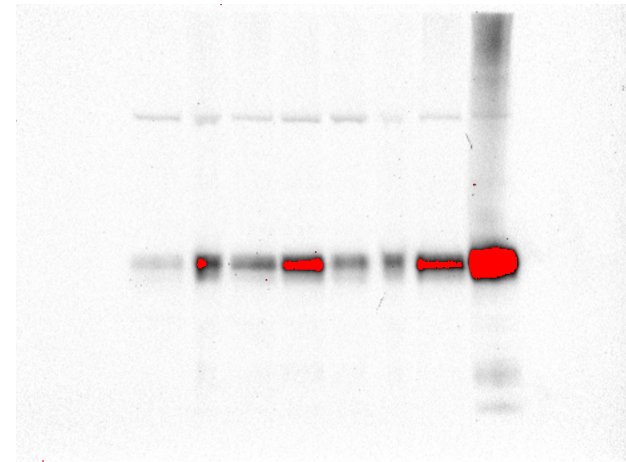

**Anti-eNOS**

**Ponceau red**

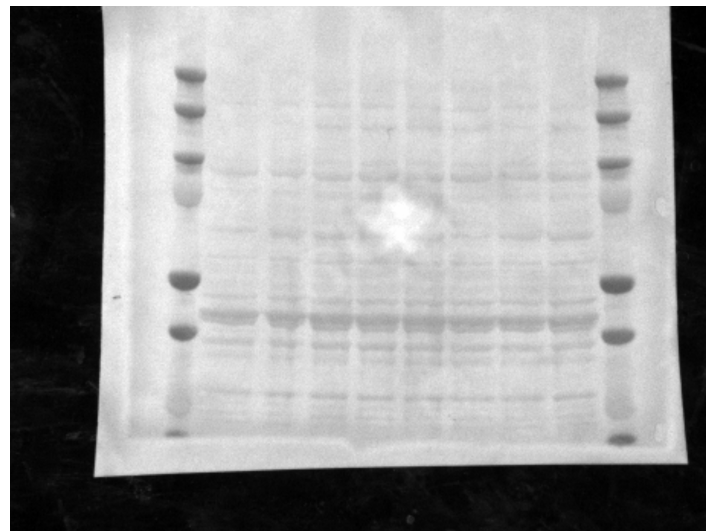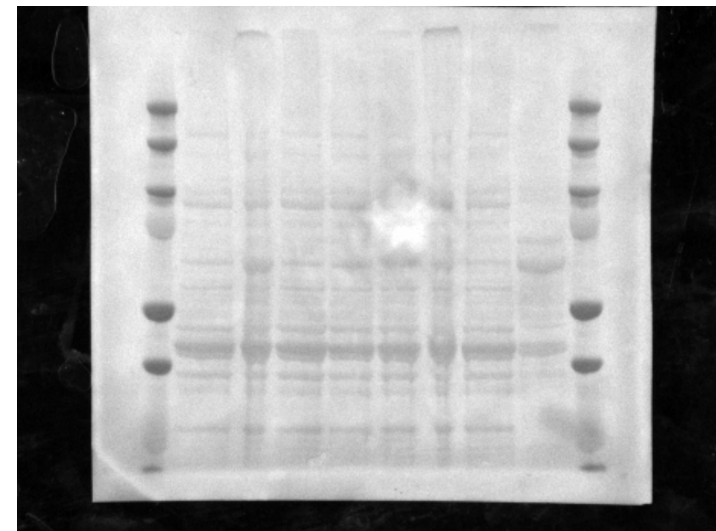

Supplement: res-129-63-s001.pdf [file res-129-63-s001.pdf]
